# Supplementary material
Source: Springer Nature journal article supplement (https://www.springermedizin.de/resource/supplementary/12888_2008_504_MOESM2_ESM.pdf/9483446)
Supplement: MOESM2 [file 9483446]

**Study name****Statistics for each study****Std diff in means and 95% CI**

|              | <b>Std diff<br/>in means</b> | <b>Lower<br/>limit</b> | <b>Upper<br/>limit</b> | <b>p-Value</b> |
|--------------|------------------------------|------------------------|------------------------|----------------|
| Lange 2001   | 0.80                         | -0.02                  | 1.62                   | 0.06           |
| Lange 2003   | 1.34                         | 0.89                   | 1.79                   | 0.00           |
| Swinson 1995 | 0.98                         | 0.33                   | 1.63                   | 0.00           |
|              | 1.15                         | 0.81                   | 1.49                   | 0.00           |

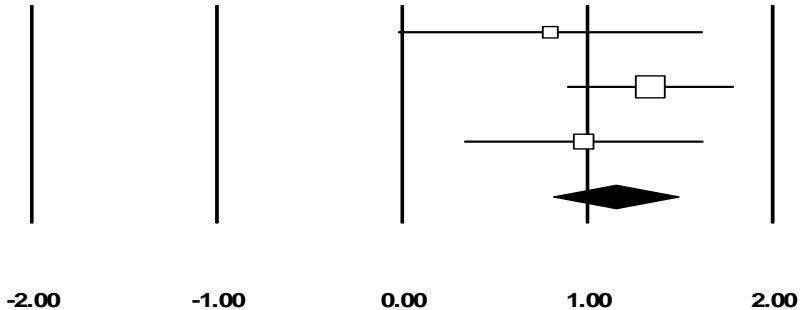

Favours Control

Favours Technology
